# Supplementary material
Source: PubMed Central journal article supplement (PMC4983849)
Supplement: pnas.1601352113.sd01.pdf [file pnas.1601352113.sd01.pdf]

**Dataset S1** The list of 492 inbred lines for GWAS analysis

| <b>Serial number</b> | <b>Inbreds</b> | <b>27-kD zein<sup>1</sup></b> |
|----------------------|----------------|-------------------------------|
| 2097                 | shen5005       | low                           |
| 2101                 | mei68113       | low                           |
| 2114                 | N138           | low                           |
| 2120                 | DM101B         | low                           |
| 2121                 | D88            | low                           |
| 2129                 | GN4095         | low                           |
| 2131                 | LM-2           | low                           |
| 2136                 | B95            | low                           |
| 2139                 | SC-9           | low                           |
| 2140                 | 4003           | low                           |
| 2143                 | KP3130         | low                           |
| 2144                 | L-1            | low                           |
| 2151                 | W668           | low                           |
| 2153                 | W969           | low                           |
| 2154                 | W968           | low                           |
| 2163                 | 2005-4         | low                           |
| 2167                 | B394           | low                           |
| 2169                 | huangchanga    | low                           |
| 2172                 | huangchangb    | low                           |
| 2173                 | W499           | low                           |
| 2185                 | jian1495b      | low                           |
| 2189                 | T24            | low                           |
| 2196                 | L473           | low                           |
| 2198                 | equn4          | low                           |
| 2208                 | ji444          | low                           |
| 2210                 | huangyesi3     | low                           |
| 2212                 | ji63           | low                           |
| 2214                 | H21            | low                           |
| 2220                 | MO113          | low                           |
| 2228                 | zheng32        | low                           |
| 2229                 | zheng653       | low                           |
| 2236                 | ye832          | low                           |
| 2248                 | D869           | low                           |
| 2253                 | D1049          | low                           |
| 2254                 | D1051          | low                           |
| 2258                 | nan21-3        | low                           |
| 2259                 | K14            | low                           |
| 2261                 | Q1261          | low                           |
| 2273                 | 200B           | low                           |

|      |              |     |
|------|--------------|-----|
| 2284 | huangzaosi   | low |
| 2290 | GY3          | low |
| 2294 | 4936         | low |
| 2297 | e220         | low |
| 2313 | R150         | low |
| 2318 | qi319        | low |
| 2319 | xing230      | low |
| 2328 | huotanghuang | low |
| 2329 | huo17        | low |
| 2341 | PH6WC        | low |
| 2342 | PH4CV        | low |
| 2343 | hai9-21      | low |
| 2345 | DH65232      | low |
| 2346 | J1533        | low |
| 2350 | A801         | low |
| 2355 | DF24         | low |
| 2361 | shen977      | low |
| 2370 | 178          | low |
| 2373 | 150-4        | low |
| 2379 | 9710         | low |
| 2380 | 9711         | low |
| 2386 | 196          | low |
| 2391 | 68122        | low |
| 2395 | shan89       | low |
| 2398 | 5023         | low |
| 2410 | 1121         | low |
| 2416 | Ay420        | low |
| 2420 | A619         | low |
| 2424 | B76          | low |
| 2427 | CM105        | low |
| 2436 | A679         | low |
| 2440 | W182bn       | low |
| 2444 | W117         | low |
| 2454 | CT52C        | low |
| 2455 | jiao51       | low |
| 2457 | 77           | low |
| 2461 | yun147       | low |
| 2462 | HHe01        | low |
| 2464 | W2H03        | low |
| 2475 | CT109        | low |
| 2476 | yu82         | low |
| 2477 | Lx9801       | low |
| 2478 | E28          | low |

|      |              |     |
|------|--------------|-----|
| 2485 | han49        | low |
| 2494 | yi49         | low |
| 2500 | Lo1125       | low |
| 2504 | shen135      | low |
| 2507 | cheng435     | low |
| 2510 | bai197       | low |
| 2519 | jinsui54     | low |
| 2520 | 84-126-15-1  | low |
| 2533 | 91huang10    | low |
| 2540 | chaoxianbai  | low |
| 2541 | B12          | low |
| 2569 | lu65         | low |
| 2572 | yan156       | low |
| 2573 | yan103       | low |
| 2574 | yan172       | low |
| 2583 | 200-24-13413 | low |
| 2590 | jiao05       | low |
| 2593 | zheng58      | low |
| 2597 | da255        | low |
| 2598 | 897          | low |
| 2599 | zhonger/02   | low |
| 2604 | yue39-4      | low |
| 2605 | M9           | low |
| 2606 | shuangM9B-1  | low |
| 2608 | cai11-8      | low |
| 2615 | SZ3          | low |
| 2620 | L069         | low |
| 2625 | ning37       | low |
| 2630 | zhongyin15   | low |
| 2637 | 72-125       | low |
| 2664 | han21        | low |
| 2668 | huobai       | low |
| 2690 | F42          | low |
| 2692 | B47          | low |
| 2697 | DJ7          | low |
| 2710 | PHJ75        | low |
| 2712 | PHN29        | low |
| 2716 | LH190        | low |
| 2717 | IBC2         | low |
| 2721 | PHV78        | low |
| 2726 | PB80         | low |
| 2732 | PH207        | low |
| 2745 | PHK42        | low |

|      |        |        |
|------|--------|--------|
| 2746 | PHT55  | low    |
| 2747 | OH43   | low    |
| 2753 | LH82   | low    |
| 2757 | IBB14  | low    |
| 2758 | PHH93  | low    |
| 2760 | PHP02  | low    |
| 2764 | 78551S | low    |
| 2774 | LH1    | low    |
| 2941 | LH196  | low    |
| 2950 | PHP76  | low    |
| 2955 | Lp215D | low    |
| 2961 | PHW30  | low    |
| 2963 | MBSJ   | low    |
| 2965 | LH215  | low    |
| 2966 | MM402A | low    |
| 2968 | LIBC4  | low    |
| 2969 | 83IBI3 | low    |
| 2973 | PHPR5  | low    |
| 2977 | PHNV9  | low    |
| 2979 | ML606  | low    |
| 2990 | IB014  | low    |
| 2992 | LH150  | low    |
| 3003 | IBB15  | low    |
| 3006 | 11430  | low    |
| 3013 | NS501  | low    |
| 3014 | OQ603  | low    |
| 3026 | L127   | low    |
| 3027 | L135   | low    |
| 3028 | L139   | low    |
| 3032 | PHK35  | low    |
| 3033 | PHM10  | low    |
| 3034 | PHN37  | low    |
| 3037 | PHP55  | low    |
| 3041 | PHT22  | low    |
| 2099 | R31    | medium |
| 2104 | DH138  | medium |
| 2105 | DH149  | medium |
| 2108 | B7     | medium |
| 2109 | R08    | medium |
| 2113 | 1145   | medium |
| 2117 | L061M  | medium |
| 2119 | F7584  | medium |
| 2122 | D619   | medium |

|      |           |        |
|------|-----------|--------|
| 2123 | D15       | medium |
| 2124 | DM07      | medium |
| 2126 | D1139     | medium |
| 2130 | C521      | medium |
| 2138 | SC-14     | medium |
| 2145 | W172      | medium |
| 2146 | SW153     | medium |
| 2156 | 18        | medium |
| 2157 | 1614      | medium |
| 2158 | 1610      | medium |
| 2168 | changK    | medium |
| 2175 | SC30-1    | medium |
| 2176 | 468-3     | medium |
| 2179 | XF134     | medium |
| 2180 | M131-5    | medium |
| 2182 | XOP2      | medium |
| 2183 | R1656     | medium |
| 2184 | jian1495a | medium |
| 2190 | Lo415     | medium |
| 2191 | D20       | medium |
| 2193 | FC-13     | medium |
| 2194 | L05-6     | medium |
| 2197 | equn3     | medium |
| 2201 | 08-64     | medium |
| 2202 | 697       | medium |
| 2215 | shuang741 | medium |
| 2217 | ji434     | medium |
| 2219 | ji4112    | medium |
| 2221 | xi502     | medium |
| 2224 | luyuan92  | medium |
| 2225 | S22       | medium |
| 2226 | ye515     | medium |
| 2227 | ye8112    | medium |
| 2235 | tie7922   | medium |
| 2239 | chang72   | medium |
| 2242 | yan812    | medium |
| 2244 | D854      | medium |
| 2245 | D857      | medium |
| 2246 | D856      | medium |
| 2247 | D864      | medium |
| 2249 | D881      | medium |
| 2252 | D978      | medium |
| 2257 | yu87-1    | medium |

|      |             |        |
|------|-------------|--------|
| 2265 | suwan1611   | medium |
| 2269 | 1205A       | medium |
| 2270 | su75        | medium |
| 2274 | 3489a       | medium |
| 2276 | P138        | medium |
| 2277 | N68a        | medium |
| 2278 | K12         | medium |
| 2280 | 619         | medium |
| 2281 | shen137     | medium |
| 2282 | 3335        | medium |
| 2293 | 5032        | medium |
| 2303 | 99122       | medium |
| 2304 | chong72     | medium |
| 2305 | M1016       | medium |
| 2307 | P25         | medium |
| 2310 | d140        | medium |
| 2311 | W9706       | medium |
| 2316 | chengzi2142 | medium |
| 2321 | 20837       | medium |
| 2335 | SC14        | medium |
| 2340 | 9058        | medium |
| 2353 | DF27        | medium |
| 2357 | 1127        | medium |
| 2359 | 7236        | medium |
| 2360 | 433-7       | medium |
| 2374 | P007        | medium |
| 2377 | 9702        | medium |
| 2381 | y9961       | medium |
| 2385 | Yd6         | medium |
| 2387 | huangyesi   | medium |
| 2389 | wu126       | medium |
| 2394 | M22         | medium |
| 2397 | yi36        | medium |
| 2399 | ji853       | medium |
| 2400 | zi330       | medium |
| 2404 | 8701        | medium |
| 2408 | F7          | medium |
| 2414 | dan598      | medium |
| 2417 | OH7         | medium |
| 2421 | A554        | medium |
| 2423 | A632        | medium |
| 2430 | NC268       | medium |
| 2431 | B37         | medium |

|      |                   |        |
|------|-------------------|--------|
| 2442 | W64A              | medium |
| 2445 | HP301             | medium |
| 2459 | zhen367           | medium |
| 2460 | daqing133         | medium |
| 2463 | mu6               | medium |
| 2471 | 9101-7            | medium |
| 2488 | ziyu3             | medium |
| 2490 | M3736             | medium |
| 2495 | yi67              | medium |
| 2497 | song1145          | medium |
| 2506 | zhangjin6         | medium |
| 2525 | lan766-4-2        | medium |
| 2532 | 91huang5          | medium |
| 2536 | 785               | medium |
| 2550 | liao5110          | medium |
| 2562 | fu8527            | medium |
| 2565 | fu8701            | medium |
| 2566 | longkang1         | medium |
| 2571 | yan38             | medium |
| 2580 | qi410             | medium |
| 2581 | luyuan133         | medium |
| 2588 | 32                | medium |
| 2589 | zhengbai11        | medium |
| 2591 | 6                 | medium |
| 2594 | shuangtaiwu       | medium |
| 2595 | chang7daxian1     | medium |
| 2601 | 75-24             | medium |
| 2609 | 15-14gao          | medium |
| 2610 | 17564             | medium |
| 2611 | 030-1             | medium |
| 2618 | L005              | medium |
| 2635 | ZPON7             | medium |
| 2638 | 75-364            | medium |
| 2649 | H114              | medium |
| 2651 | CML125-2 (pianma) | medium |
| 2653 | DH65232(DH9)      | medium |
| 2663 | Lo1067            | medium |
| 2665 | chang69           | medium |
| 2667 | luosu3            | medium |
| 2672 | xingK36           | medium |
| 2684 | ES40              | medium |
| 2687 | LH52              | medium |
| 2688 | 78002A            | medium |

|      |         |        |
|------|---------|--------|
| 2694 | PHN11   | medium |
| 2699 | PHG72   | medium |
| 2700 | B09     | medium |
| 2701 | LH156   | medium |
| 2702 | PHZ51   | medium |
| 2704 | PHW43   | medium |
| 2706 | PHW52   | medium |
| 2708 | PHJ31   | medium |
| 2711 | PHM57   | medium |
| 2714 | 795     | medium |
| 2718 | PHK05   | medium |
| 2719 | PHK24   | medium |
| 2720 | PHR25   | medium |
| 2722 | 78004   | medium |
| 2723 | LH60    | medium |
| 2725 | PHG71   | medium |
| 2727 | FAPW    | medium |
| 2730 | PHG35   | medium |
| 2731 | PHJ40   | medium |
| 2734 | B73     | medium |
| 2737 | LH123HT | medium |
| 2738 | LH38    | medium |
| 2740 | LH74    | medium |
| 2741 | LH132   | medium |
| 2749 | HBAI    | medium |
| 2750 | PHG50   | medium |
| 2752 | Pa91    | medium |
| 2756 | HB8229  | medium |
| 2759 | PHM44   | medium |
| 2763 | PHT10   | medium |
| 2766 | PHG24   | medium |
| 2767 | FBHJ    | medium |
| 2772 | LH149   | medium |
| 2777 | PHT77   | medium |
| 2779 | LH145   | medium |
| 2780 | PHG47   | medium |
| 2940 | LH127   | medium |
| 2945 | LH202   | medium |
| 2947 | LH192   | medium |
| 2948 | LH193   | medium |
| 2954 | LH208   | medium |
| 2958 | PHN66   | medium |
| 2959 | PHR55   | medium |



|      |         |        |
|------|---------|--------|
| 2960 | PHR58   | medium |
| 2964 | MBUB    | medium |
| 2970 | NQ508   | medium |
| 2971 | PHBA6   | medium |
| 2972 | PHP85   | medium |
| 2974 | PHR30   | medium |
| 2975 | PHT69   | medium |
| 2978 | PHWG5   | medium |
| 2983 | LH119   | medium |
| 2984 | MDF-13D | medium |
| 2989 | 6103    | medium |
| 2998 | PHW17   | medium |
| 3000 | NS701   | medium |
| 3004 | 787     | medium |
| 3005 | W8304   | medium |
| 3007 | 2369    | medium |
| 3010 | 87916W  | medium |
| 3018 | 1538    | medium |
| 3019 | CR14    | medium |
| 3029 | W8555   | medium |
| 3035 | PHN73   | medium |
| 3036 | PHN82   | medium |
| 3038 | PHP60   | medium |
| 3042 | PHV37   | medium |
| 3044 | 2FACC   | medium |
| 3047 | 478     | medium |
| 3049 | huangC  | medium |
| 3050 | D340    | medium |
| 2204 | K10     | medium |
| 2213 | ji846   | medium |
| 2230 | hu803   | medium |
| 2240 | wu109   | medium |
| 2250 | D883    | medium |
| 2275 | Z31B    | medium |
| 2285 | WN11H   | medium |
| 2298 | DF32    | medium |
| 2308 | SS99    | medium |
| 2363 | niu2-1  | medium |
| 2382 | 1101    | medium |
| 2405 | siyi    | medium |
| 2412 | xun971  | medium |
| 2439 | Sg1533  | medium |
| 2441 | Va26    | medium |

|      |            |        |
|------|------------|--------|
| 2474 | yu537A     | medium |
| 2505 | zhangxi28  | medium |
| 2513 | H2         | medium |
| 2521 | xinlun5-9  | medium |
| 2640 | MP704      | medium |
| 2728 | LH61       | medium |
| 2962 | 29MIBZ2    | medium |
| 2988 | CR1HT      | medium |
| 2991 | MBNA       | medium |
| 3016 | S8324      | medium |
| 3017 | S8326      | medium |
| 3021 | WIL901     | medium |
| 2103 | 757        | high   |
| 2107 | B4         | high   |
| 2115 | E600       | high   |
| 2118 | L061F      | high   |
| 2125 | SC24-1     | high   |
| 2127 | W222       | high   |
| 2128 | Y223       | high   |
| 2135 | B98        | high   |
| 2142 | PN2-8      | high   |
| 2148 | W238       | high   |
| 2162 | M101       | high   |
| 2165 | E601       | high   |
| 2166 | E588       | high   |
| 2171 | D33A       | high   |
| 2178 | XF223      | high   |
| 2192 | chang7-2   | high   |
| 2199 | PN2        | high   |
| 2200 | 18-599     | high   |
| 2211 | zaC546     | high   |
| 2238 | yu374      | high   |
| 2243 | qi205      | high   |
| 2251 | D886       | high   |
| 2260 | cheng698-3 | high   |
| 2262 | ye52106    | high   |
| 2264 | ye8001     | high   |
| 2272 | R017       | high   |
| 2289 | fangyin    | high   |
| 2300 | 7903E      | high   |
| 2309 | BM         | high   |
| 2312 | R25        | high   |
| 2324 | Los-6      | high   |

|      |               |      |
|------|---------------|------|
| 2327 | XF27          | high |
| 2333 | 802           | high |
| 2334 | SC11-1        | high |
| 2351 | 8982          | high |
| 2352 | DF20          | high |
| 2358 | P167          | high |
| 2362 | K22           | high |
| 2364 | 68139         | high |
| 2376 | M3            | high |
| 2383 | 3189          | high |
| 2390 | W344          | high |
| 2422 | Ms71          | high |
| 2426 | ND246         | high |
| 2428 | Mo24W         | high |
| 2437 | Co109         | high |
| 2443 | W153R         | high |
| 2446 | 4722          | high |
| 2452 | shangyin110-1 | high |
| 2453 | 7146          | high |
| 2458 | 7327          | high |
| 2468 | 140           | high |
| 2472 | xun92-8       | high |
| 2482 | zhong128      | high |
| 2483 | zhong451      | high |
| 2484 | zhonghuang64  | high |
| 2489 | guangyou5     | high |
| 2491 | daMO          | high |
| 2511 | ji432         | high |
| 2524 | xuan6         | high |
| 2530 | 91huang15     | high |
| 2534 | chihuang14    | high |
| 2543 | fu96          | high |
| 2547 | liao2202      | high |
| 2548 | liao2204      | high |
| 2549 | liao7794      | high |
| 2559 | 96201         | high |
| 2560 | gan41         | high |
| 2568 | 2005          | high |
| 2587 | guan17-1      | high |
| 2603 | yue89E4-2     | high |
| 2616 | wu125         | high |
| 2624 | ning24        | high |
| 2626 | ning45        | high |

|      |           |      |
|------|-----------|------|
| 2631 | NN14B     | high |
| 2669 | yuanwu05  | high |
| 2686 | H127      | high |
| 2691 | LH93      | high |
| 2693 | 807       | high |
| 2696 | LH54      | high |
| 2713 | PHW03     | high |
| 2733 | Mo17      | high |
| 2742 | Seagu1117 | high |
| 2748 | LH65      | high |
| 2755 | 78371A    | high |
| 2943 | LH162     | high |
| 2949 | RS710     | high |
| 2952 | BCC03     | high |
| 2953 | LH128     | high |
| 2956 | PHK93     | high |
| 3008 | 2MA22     | high |
| 3009 | 6M502     | high |
| 3011 | MBST      | high |
| 3020 | WIL900    | high |
| 3024 | E8501     | high |
| 3025 | J8606     | high |
| 3043 | PHW20     | high |

27-kD zein<sup>1</sup> refers to the expression levels of 27-kDa  $\gamma$ -zein in different inbred lines analyzed by SDS-PAGE. Low represents that the expression of 27-kDa  $\gamma$ -zein is lower than B73, medium similar to B73, high higher than B73.
